# Supplementary material for: High efficiency of livestock ammonia emission controls on alleviating particulate nitrate during a severe winter haze episode in northern China
Source: Copernicus journal article supplement (doi:10.5194/acp-2018-896), 2018-09-12
Supplement: Supplementary file 1 [file acp-2018-896-supplement.pdf]

**High efficiency of livestock ammonia emission controls on alleviating  
particulate nitrate during a severe winter haze episode in northern  
China**

Zhenying Xu<sup>1</sup>, Mingxu Liu<sup>1</sup>, Yu Song<sup>1\*</sup>, Shuxiao Wang<sup>2\*</sup>, Lin Zhang<sup>3</sup>, Tingting Xu<sup>1</sup>, Tiantian Wang<sup>1</sup>, Tian Zhou<sup>1</sup>, Caiqing Yan<sup>1</sup>, Yele Sun<sup>4</sup>, Yuepeng Pan<sup>4</sup>, Min Hu<sup>1</sup>, Mei Zheng<sup>1\*</sup> and Tong Zhu<sup>1</sup>

1. State Key Joint Laboratory of Environmental Simulation and Pollution Control  
Department of Environmental Science, Peking University, Beijing, 100871, China

2. State Key Joint Laboratory of Environment Simulation and Pollution Control, School of Environment, Tsinghua University, Beijing 100084, China

3. Laboratory for Climate and Ocean-Atmosphere Sciences, Department of Atmospheric and Oceanic Sciences, School of Physics, Peking University, Beijing 100871, China

4. State Key Laboratory of Atmospheric Boundary Layer Physics and Atmospheric Chemistry, Institute of Atmospheric Physics, Chinese Academy of Sciences, Beijing 100029, China

\*Corresponding author: Yu Song ([songyu@pku.edu.cn](mailto:songyu@pku.edu.cn)), Shuxiao Wang ([shxwang@tsinghua.edu.cn](mailto:shxwang@tsinghua.edu.cn)), Mei Zheng ([mzheng@pku.edu.cn](mailto:mzheng@pku.edu.cn)).

**Contents of this file**

Figures S1 to S4

Table S1

**Introduction**

This supporting information consists of the following parts. Firstly, Figure S1 and S2 provide the validation of the model performance about ISORROPIA and WRF-Chem by comparing predictions to measurements. Secondly, Figure S3 provides the comparison of the spatial distributions of livestock NH<sub>3</sub> emissions between base case and emission reduction case in December 2015 in northern China. Thirdly, Figure S4 provides the molar ratio (R) and the particulate NO<sub>3</sub><sup>-</sup> reduction rate of each observation data point in December 2015 and December 2016. Finally, Table S1 provides the comparison of NH<sub>3</sub> EFs for different livestock among China (present), China (after taking manure management measures), USA, Europe and Global.

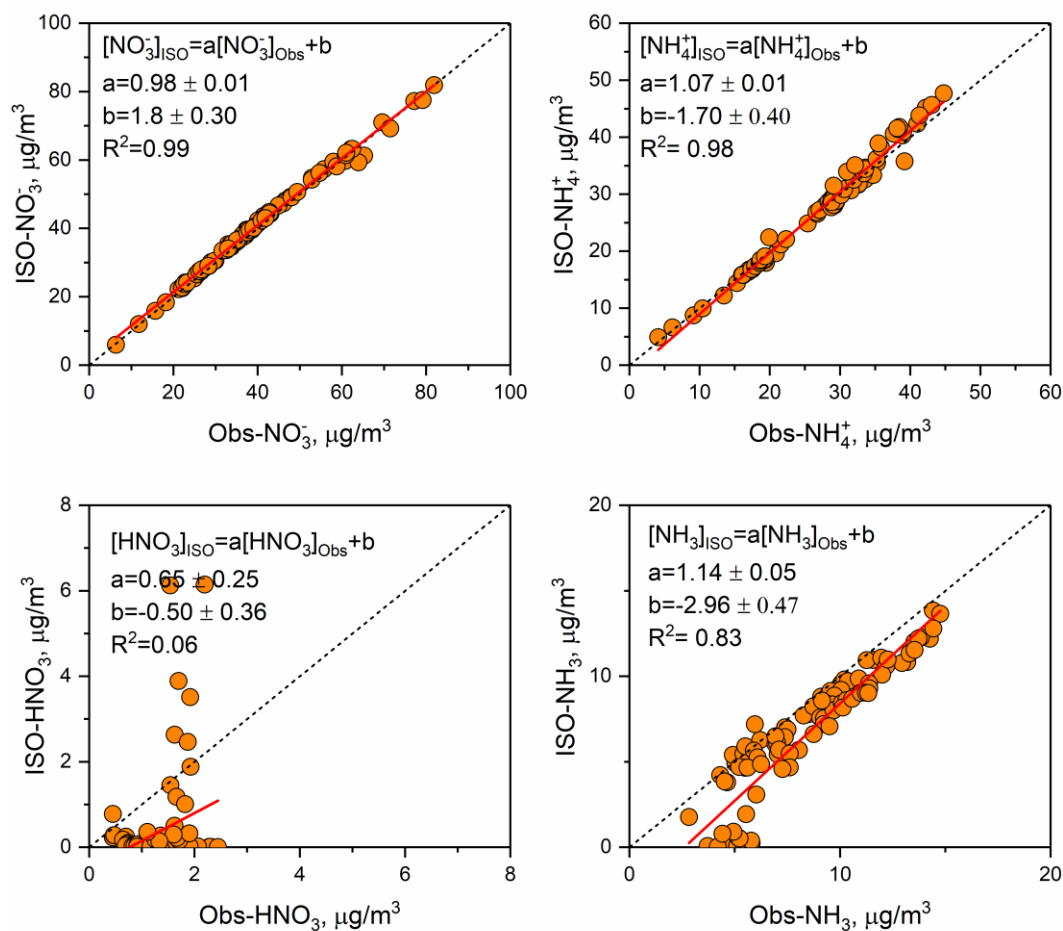

34

35 **Figure S1.** The comparison of particle nitrate ( $\text{NO}_3^-$ ), ammonium ( $\text{NH}_4^+$ ), gaseous  
 36  $\text{HNO}_3$  and gaseous  $\text{NH}_3$  between observations and ISORROPIA-II simulations during  
 37 six severe haze cases.

38 We quantify the performance of ISORROPIA-II by using the error metric, the mean  
 39 bias (MB),  $\text{MB} = \frac{1}{N} \sum_i^n (I_i - O_i)$ , where  $I_i$  represents predictions of ISORROPIA-II for  
 40 data point  $i$ ,  $O_i$  represents the corresponding observations and  $n$  is the total number  
 41 of data points.

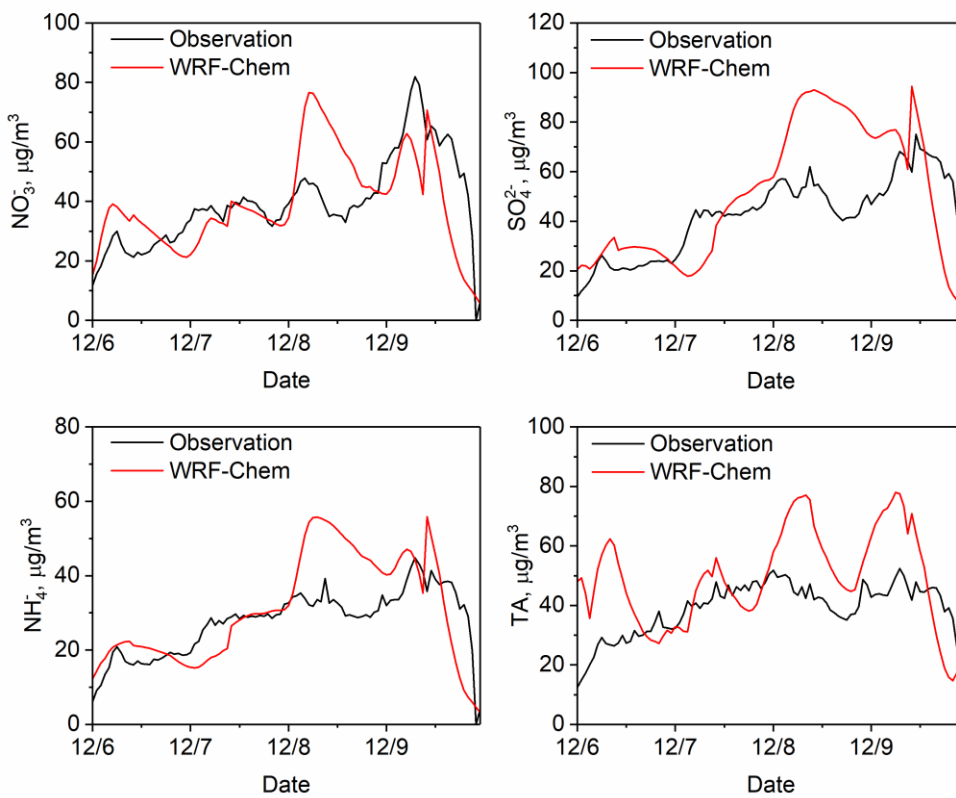

42

43 **Figure S2.** The comparison of particle nitrate ( $\text{NO}_3^-$ ), sulfate ( $\text{SO}_4^{2-}$ ), ammonium ( $\text{NH}_4^+$ )  
 44 and total ammonia (TA) between observations and WRF-Chem simulations during case  
 45 1 (from 6 to 10, December 2015).

46

47

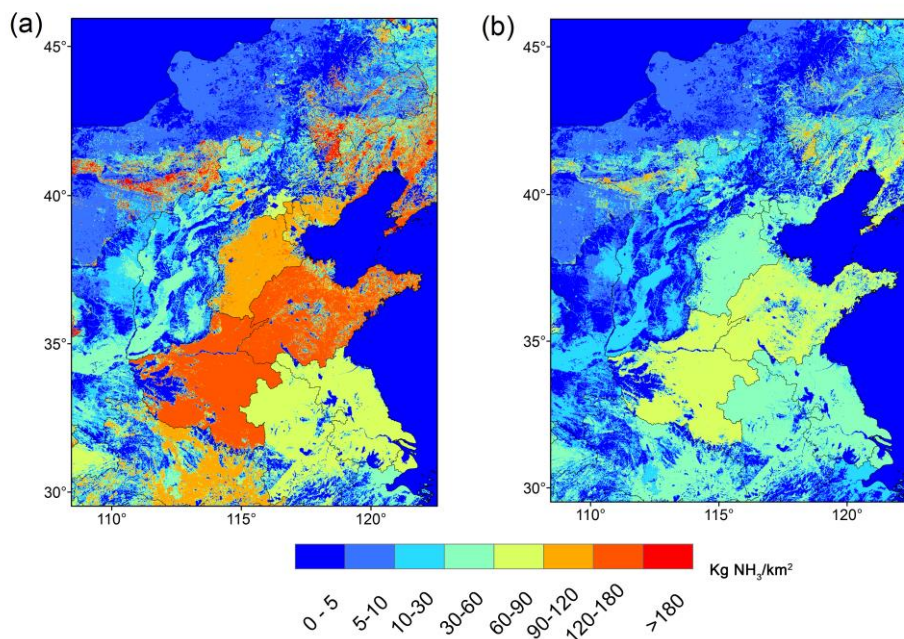

48

49 **Figure S3.** The comparison of the spatial distributions of livestock NH<sub>3</sub> emissions  
 50 between (a) the base case and (b) the emission reduction case in December 2015 in  
 51 northern China.

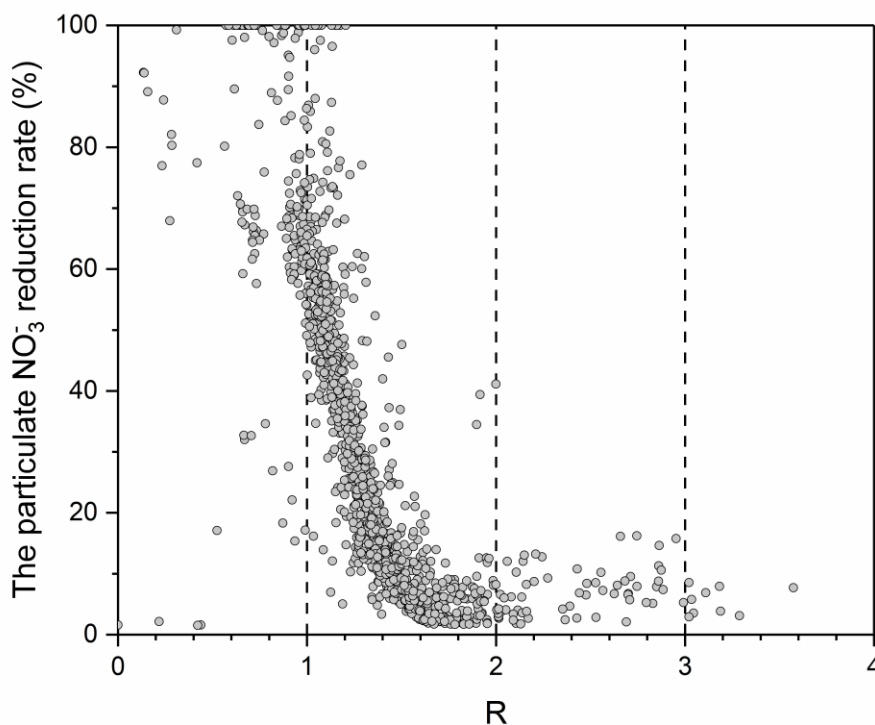

52

53 **Figure S4.** The molar ratio (R) and the particulate NO<sub>3</sub><sup>-</sup> reduction rate of each  
 54 observation data point in December 2015 and December 2016. The particulate NO<sub>3</sub><sup>-</sup>

55 reduction rate is predicted by ISORROPIA-II under the condition of 40% TA reduction.

56 **Table 1.** Comparison of NH<sub>3</sub> EFs for different livestock among China (present), China  
57 (simulated taking manure management measures), USA, Europe and Global.

| Livestock   | NH <sub>3</sub> EFs (Kg/(1000kg N)/year) |                  |                  |                     |                     |
|-------------|------------------------------------------|------------------|------------------|---------------------|---------------------|
|             | China <sup>a</sup>                       | China<br>(after) | USA <sup>b</sup> | Europe <sup>c</sup> | Global <sup>d</sup> |
| Swine       | 636                                      | 232              | 263              | 537                 | 398                 |
| Beef cattle | 423                                      | 172              | 276              | 224                 | 230                 |
| Sheep       | 337                                      | 156              | 205              | 90                  | 50                  |
| Goat        | 337                                      | 156              | 406              | 90                  | 45                  |

58 *Note.* The unit of emission factor used Kg per 1,000 kg of nitrogen (N) per year to unify  
59 different amounts of livestock excrement in various regions.

60 <sup>a</sup>(Huang et al., 2014) <sup>b</sup>(Agency, 2015) <sup>c</sup>(Amon; et al., 2016) <sup>d</sup>(Bouwman et al., 1997)

## 61 **References**

- 62 Agency, U. S. E. P.: 2011 National Emissions Inventory, version 2 Technical Support  
63 Document., Research Triangle Park, North Carolina, 85-86 pp., 2015.
- 64 Amon;, B., Hutchings;, N., Dämmgen;, U., and Webb;, J.: EMEP/EEA air pollutant  
65 emission inventory Guidebook 2016, 2016.
- 66 Bouwman, A. F., Lee, D. S., Asman, W. A. H., Dentener, F. J., VanderHoek, K. W., and  
67 Olivier, J. G. J.: A global high-resolution emission inventory for ammonia, Glob.  
68 Biogeochem. Cycle, 11, 561-587, 10.1029/97gb02266, 1997.
- 69 Huang, R. J., Zhang, Y., Bozzetti, C., Ho, K. F., Cao, J. J., Han, Y., Daellenbach, K. R.,  
70 Slowik, J. G., Platt, S. M., Canonaco, F., Zotter, P., Wolf, R., Pieber, S. M., Bruns,  
71 E. A., Crippa, M., Ciarelli, G., Piazzalunga, A., Schwikowski, M., Abbaszade, G.,  
72 Schnelle-Kreis, J., Zimmermann, R., An, Z., Szidat, S., Baltensperger, U., El  
73 Haddad, I., and Prevot, A. S.: High secondary aerosol contribution to particulate  
74 pollution during haze events in China, Nature, 514, 218-222, 10.1038/nature13774,  
75 2014.

76
